# Supplementary material
Source: Springer Nature journal article supplement (https://www.springermedizin.de/resource/supplementary/12891_2010_1028_MOESM1_ESM.pdf/9506970)
Supplement: MOESM1 [file 9506970]

**Selection of patients**

Consent Form

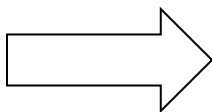

**Randomization into  
Groups A and B**

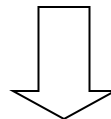

**Appointment 1: 3 months after surgery**

DASH questionnaire  
Forearm/wrist range of motion  
Grip strength  
Ordinal scale for pain  
Ordinal scale for patient satisfaction  
PRWE Score

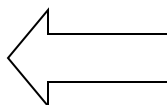

**Group A:**

• No Computer Assisted Surgery (CAS)

**Group B:**

• Computer Assisted Surgery (CAS) and preoperative planning with virtual osteotomy  
**(20 patients per group)**

DASH questionnaire  
Forearm/wrist range of motion  
Grip strength  
Ordinal scale for pain  
Ordinal scale for patient satisfaction  
PRWE Score

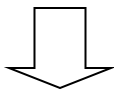

**Appointment 2: 6months after surgery**

DASH questionnaire  
Forearm/wrist range of motion  
Grip strength  
Ordinal scale for pain  
Ordinal scale for patient satisfaction  
PRWE Score

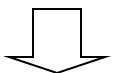

**Appointment 3: 12months after surgery**

DASH questionnaire  
Forearm/wrist range of motion  
Grip strength  
Ordinal scale for pain  
Ordinal scale for patient satisfaction  
PRWE Score

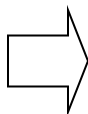

**Statistical analysis**

Student t-test  
Chi square  
Pearson's correlation test  
Fischer test
